# Supplementary material for: Iberoamérica y la Corte Penal Internacional : debates, reflexiones y preguntas
Source: Oxford University Press journal article supplement (doi:10.1158/1078-0432.ccr-18-0120), 2006-01-01
Supplement: 10780432ccr180120-sup-195403_2_supp_4607036_p532gr.doc [file 10780432ccr180120-sup-195403_2_supp_4607036_p532gr.doc]

**Supplements Table 1.** Multivariate analyses of progression-free survival and overall survival (n=57) of chemo-receiving patients.

|  |  | Progression-free survival | | |  | Overall survival | | |
| --- | --- | --- | --- | --- | --- | --- | --- | --- |
| Variables |  | HR | 95% CI | *P** |  | HR | 95% CI | *P** |
| Circulating tumor cells  neg. vs. pos. |  | 4.203 | 1.416 – 12.471 | 0.010 |  | 1.855 | 0.912 – 3.775 | 0.088 |
| Resection margins |  |  |  |  |  |  |  |  |
| R1 vs. R0 |  | 1.182 | 0.431 – 3.420 | 0.745 |  | 0.628 | 0.248 – 1.594 | 0.328 |
| R2 vs. R0 |  | 0.010 | 0.000 – 0.211 | 0.003 |  | 1.211 | 0.090 – 16.397 | 0.885 |
| Rx vs.R0 |  | 0.041 | 0.001 – 1.821 | 0.099 |  | 0.208 | 0.008 – 5.408 | 0.345 |
|  |  |  |  |  |  |  |  |  |
| UICC stage |  |  |  |  |  |  |  |  |
| UICC I vs. UICC II |  | 0.988 | 0.113 – 8.640 | 0.991 |  | 0.235 | 0.025 – 2.204 | 0.205 |
| UICC III vs. UICC II |  | 1.742 | 0.261 – 11.637 | 0.567 |  | 2.321 | 0.515 – 10.454 | 0.273 |
| UICC IV vs. UICC II |  | 1.715 | 0.540 – 5.444 | 0.360 |  | 1.659 | 0.508 – 5.420 | 0.402 |
|  |  |  |  |  |  |  |  |  |
| Mode of surgery |  |  |  |  |  |  |  |  |
| Whipple vs. palliative |  | 0.018 | 0.001 – 0.274 | 0.004 |  | 0.840 | 0.111 – 7.330 | 0.872 |
| SSP§ vs. palliative |  | 0.046 | 0.003 – 0.698 | 0.027 |  | 2.669 | 0.140 – 59.631 | 0.526 |
| TSP§§ vs. palliative |  | - |  |  |  | 2.483 | 0.267 – 22.331 | 0.422 |
|  |  |  |  |  |  |  |  |  |

*Indicates significance according to Cox regression analysis comparing the specified variables.

§ SSP, subtotal spleenpancreatectomy

§§ TSP, total spleenpancreatectomy
